# Supplementary material for: Long-Distance Dispersal by Sea-Drifted Seeds Has Maintained the Global Distribution of Ipomoea pes-caprae subsp. brasiliensis (Convolvulaceae)
Source: PubMed Central journal article supplement (PMC3995641; doi:10.1371/journal.pone.0091836), 2014-04-22
Supplement: pone.0091836.s006.pdf [file pone.0091836.s006.pdf]

Table S3. Summary of Genetic Divergences and Differentiations between each two regions

| <b>Locus</b>   | <b>Pair</b>                       | <b>S</b> | <b>Sf</b> | <b>Ktotal</b> | <b>Knc</b> | <b>Ks</b> | <b>Ka</b> | <b>Ka/Ks</b> |
|----------------|-----------------------------------|----------|-----------|---------------|------------|-----------|-----------|--------------|
| <i>ALS</i>     | <i>pes-caprae vs brasiliensis</i> | 17       | 0         | 0.02445       | 0.00000    | 0.02993   | 0.00590   | 0.19713      |
| <i>ANS</i>     | <i>pes-caprae vs brasiliensis</i> | 26       | 0         | 0.01550       | 0.02061    | 0.00904   | 0.00000   | 0.00000      |
| <i>CHS</i>     | <i>pes-caprae vs brasiliensis</i> | 30       | 0         | 0.01502       | 0.00000    | 0.01928   | 0.00231   | 0.11981      |
| <i>EST-2</i>   | <i>pes-caprae vs brasiliensis</i> | 7        | 0         | 0.00443       | 0.00000    | 0.01147   | 0.00246   | 0.21447      |
| <i>HSP-90</i>  | <i>pes-caprae vs brasiliensis</i> | 5        | 0         | 0.00323       | 0.00000    | 0.00490   | 0.00280   | 0.57143      |
| <i>TPI</i>     | <i>pes-caprae vs brasiliensis</i> | 4        | 0         | 0.00374       | 0.00000    | 0.00625   | 0.00306   | 0.48960      |
| <i>Waxy</i>    | <i>pes-caprae vs brasiliensis</i> | 4        | 0         | 0.00233       | 0.00000    | 0.00000   | 0.00293   | 0.00000      |
| <i>Average</i> | <i>pes-caprae vs brasiliensis</i> |          |           | 0.00981       | 0.00294    | 0.01155   | 0.00278   | 0.22749      |
| <i>ALS</i>     | East Pacific vs West Atlantic     | 5        | 0         | 0.00426       | 0.00000    | 0.00434   | 0.00409   | 0.94240      |
| <i>ANS</i>     | East Pacific vs West Atlantic     | 7        | 0         | 0.00111       | 0.00171    | 0.00095   | 0.00000   | 0.00000      |
| <i>CHS</i>     | East Pacific vs West Atlantic     | 1        | 0         | 0.00054       | 0.00000    | 0.00072   | 0.00000   | 0.00000      |
| <i>EST-2</i>   | East Pacific vs West Atlantic     | 2        | 0         | 0.00226       | 0.00000    | 0.00290   | 0.00000   | 0.00000      |
| <i>HSP-90</i>  | East Pacific vs West Atlantic     | 3        | 0         | 0.00339       | 0.00000    | 0.00339   | 0.00000   | 0.00000      |
| <i>TPI</i>     | East Pacific vs West Atlantic     | 3        | 0         | 0.00221       | 0.00000    | 0.00284   | 0.00000   | 0.00000      |
| <i>Waxy</i>    | East Pacific vs West Atlantic     | 3        | 0         | 0.00129       | 0.00000    | 0.00162   | 0.00000   | 0.00000      |
| <i>Average</i> | East Pacific vs West Atlantic     |          |           | 0.00215       | 0.00024    | 0.00239   | 0.00058   | 0.13463      |
| <i>ALS</i>     | Indian vs Atlantic                | 7        | 0         | 0.00330       | 0.00000    | 0.00389   | 0.00135   | 0.34704      |
| <i>ANS</i>     | Indian vs Atlantic                | 17       | 0         | 0.00627       | 0.00984    | 0.00080   | 0.00000   | 0.00000      |
| <i>CHS</i>     | Indian vs Atlantic                | 20       | 0         | 0.01922       | 0.00000    | 0.02385   | 0.00525   | 0.22013      |
| <i>EST-2</i>   | Indian vs Atlantic                | 4        | 0         | 0.00121       | 0.00000    | 0.00124   | 0.00110   | 0.88710      |
| <i>HSP-90</i>  | Indian vs Atlantic                | 5        | 0         | 0.00155       | 0.00000    | 0.00187   | 0.00147   | 0.78610      |
| <i>TPI</i>     | Indian vs Atlantic                | 6        | 0         | 0.00322       | 0.00000    | 0.00372   | 0.00149   | 0.40054      |
| <i>Waxy</i>    | Indian vs Atlantic                | 3        | 0         | 0.00365       | 0.00000    | 0.00459   | 0.00000   | 0.00000      |
| <i>Average</i> | Indian vs Atlantic                |          |           | 0.00549       | 0.00141    | 0.00571   | 0.00152   | 0.37727      |
| <i>ALS</i>     | Indian vs West Pacific            | 17       | 0         | 0.00280       | 0.00000    | 0.00361   | 0.00259   | 0.71745      |
| <i>ANS</i>     | Indian vs West Pacific            | 26       | 0         | 0.00729       | 0.01088    | 0.00550   | 0.00088   | 0.16000      |
| <i>CHS</i>     | Indian vs West Pacific            | 20       | 0         | 0.00910       | 0.00000    | 0.01136   | 0.00232   | 0.20423      |
| <i>EST-2</i>   | Indian vs West Pacific            | 7        | 0         | 0.00042       | 0.00000    | 0.00110   | 0.00023   | 0.20909      |
| <i>HSP-90</i>  | Indian vs West Pacific            | 5        | 0         | 0.00186       | 0.00000    | 0.00403   | 0.00129   | 0.32010      |
| <i>TPI</i>     | Indian vs West Pacific            | 4        | 0         | 0.00260       | 0.00000    | 0.00293   | 0.00149   | 0.50853      |
| <i>Waxy</i>    | Indian vs West Pacific            | 4        | 0         | 0.00185       | 0.00000    | 0.00233   | 0.00000   | 0.00000      |
| <i>Average</i> | Indian vs West Pacific            |          |           | 0.00370       | 0.00155    | 0.00441   | 0.00126   | 0.30277      |

The parameters shown are sequence length (bp), the number of sequences analyzed (N), the number of polymorphisms specific to each region (Sx), nucleotide diversity of all sites (pTotal) and that of noncoding regions (pnc) and synonymous (ps) and nonsynonymous (DTotal), noncodingsites (pa), and Tajima's D for all sites regions (Dnc), synonymous (Ds), and nonsynonymous sites (Da), and Fay's H (H) tests.
