# Supplementary material for: Long-Distance Dispersal by Sea-Drifted Seeds Has Maintained the Global Distribution of Ipomoea pes-caprae subsp. brasiliensis (Convolvulaceae)
Source: PubMed Central journal article supplement (PMC3995641; doi:10.1371/journal.pone.0091836), 2014-04-22
Supplement: pone.0091836.s008.pdf [file pone.0091836.s008.pdf]

Table 5\_ Maximum likelihood estimates (MLE), 95% confidence interval of  $\theta$  and migration rates (M) and number of migrants (Nm) obtained from MIGRATE-N

|                              | <b>0.05</b> | <b>MLE</b> | <b>0.95</b> | <b>Nm= M<math>\theta</math>/4</b> |
|------------------------------|-------------|------------|-------------|-----------------------------------|
| $\theta_{pes-aprae}$         | 0.00225     | 0.00443    | 0.00640     |                                   |
| $\theta_{In}$                | 0.00130     | 0.00230    | 0.00480     |                                   |
| $\theta_{WP}$                | 0.00182     | 0.00310    | 0.00630     |                                   |
| $\theta_{EP}$                | 0.00150     | 0.00300    | 0.00480     |                                   |
| $\theta_{WA}$                | 0.00146     | 0.00230    | 0.00310     |                                   |
| $\theta_{EA}$                | 0.00045     | 0.00153    | 0.00630     |                                   |
| $M_{pescaprae>brasiliensis}$ | 105.0       | 135.7      | 162.0       | 0.259                             |
| $M_{brasiliensis>pescaprae}$ | 125.0       | 180.8      | 470.6       | 0.565                             |
| $M_{In>WP}$                  | 1009.5      | 1236.3     | 2309.2      | 2.794                             |
| $M_{WP>In}$                  | 1863.0      | 2133.3     | 3903.7      | 6.246                             |
| $M_{WP>EP}$                  | 909.0       | 1176.2     | 2007.2      | 1.566                             |
| $M_{EP>WP}$                  | 821.0       | 1119.8     | 1893.5      | 2.291                             |
| $M_{EP>WA}$                  | 1182.5      | 1569.2     | 1904.8      | 2.286                             |
| $M_{WA>EP}$                  | 2283.8      | 2956.3     | 4989.7      | 3.892                             |
| $M_{WA>EA}$                  | 2073.6      | 3002.2     | 3487.5      | 2.703                             |
| $M_{EA>WA}$                  | 659.0       | 863.7      | 964.4       | 1.519                             |
| $M_{EA>In}$                  | 636.0       | 817.8      | 1501.9      | 2.403                             |
| $M_{In>EA}$                  | 4.9         | 153.5      | 426.3       | 0.512                             |

Regional groups (WA: West Atlantic, EA: East Atlantic, In: Indian, WP: West Pacific, EP: East Pacific).
