# Supplementary material for: Long-Distance Dispersal by Sea-Drifted Seeds Has Maintained the Global Distribution of Ipomoea pes-caprae subsp. brasiliensis (Convolvulaceae)
Source: PLoS One. 2014 Apr 22;9(4):e91836. doi: 10.1371/journal.pone.0091836 (PMC3995641; doi:10.1371/journal.pone.0091836)
Supplement: Table S4 — Population pairwise average Fst for Ipomoea pes-caprae calculated rom seven low-copy gene sequences. Population pairs within a rectangler of dotted lines show the ones within a geographic region employed in this study (names of regions are shown in gray letters). (PDF) [file pone.0091836.s007.pdf]

Table S4. Population pairwise average  $F_{ST}$  for *Ipomoea pes-caprae* calculated from seven low-copy gene sequences. Population pairs within a rectangle of dotted lines show the ones within a geographic region employed in this study (names of regions are shown in gray letters).

|                      |                   |      |      |      |      |      |      |      |      |      |      |      |      |      |      |      |      |      |      |      |      |      |      |      |      |      |      |      |      |      |      |      |      |    |    |    |    |    |    |    |  |    |    |    |  |  |  |  |  |  |  |  |  |  |  |  |  |  |  |  |  |  |  |  |  |  |  |  |  |  |  |  |  |
|----------------------|-------------------|------|------|------|------|------|------|------|------|------|------|------|------|------|------|------|------|------|------|------|------|------|------|------|------|------|------|------|------|------|------|------|------|----|----|----|----|----|----|----|--|----|----|----|--|--|--|--|--|--|--|--|--|--|--|--|--|--|--|--|--|--|--|--|--|--|--|--|--|--|--|--|--|
|                      | 1                 | 2    | 3    | 4    | 5    |      |      |      |      |      |      |      |      |      |      |      |      |      |      |      |      |      |      |      |      |      |      |      |      |      |      |      |      |    |    |    |    |    |    |    |  |    |    |    |  |  |  |  |  |  |  |  |  |  |  |  |  |  |  |  |  |  |  |  |  |  |  |  |  |  |  |  |  |
| 1. UAE               | <i>pes-caprae</i> |      |      |      |      |      |      |      |      |      |      |      |      |      |      |      |      |      |      |      |      |      |      |      |      |      |      |      |      |      |      |      |      |    |    |    |    |    |    |    |  |    |    |    |  |  |  |  |  |  |  |  |  |  |  |  |  |  |  |  |  |  |  |  |  |  |  |  |  |  |  |  |  |
| 2. Sri Lanka A       | 0.45              |      |      |      |      |      |      |      |      |      |      |      |      |      |      |      |      |      |      |      |      |      |      |      |      |      |      |      |      |      |      |      |      |    |    |    |    |    |    |    |  |    |    |    |  |  |  |  |  |  |  |  |  |  |  |  |  |  |  |  |  |  |  |  |  |  |  |  |  |  |  |  |  |
| 3. Sri Lanka B       | 0.42              | 0.25 |      |      |      |      |      |      |      |      |      |      |      |      |      |      |      |      |      |      |      |      |      |      |      |      |      |      |      |      |      |      |      |    |    |    |    |    |    |    |  |    |    |    |  |  |  |  |  |  |  |  |  |  |  |  |  |  |  |  |  |  |  |  |  |  |  |  |  |  |  |  |  |
| 4. India             | 0.53              | 0.46 | 0.28 |      |      |      |      |      |      |      |      |      |      |      |      |      |      |      |      |      |      |      |      |      |      |      |      |      |      |      |      |      |      |    |    |    |    |    |    |    |  |    |    |    |  |  |  |  |  |  |  |  |  |  |  |  |  |  |  |  |  |  |  |  |  |  |  |  |  |  |  |  |  |
| 5 Thailand           | 0.50              | 0.18 | 0.26 | 0.44 |      | 6    | 7    | 8    | 9    | 10   | 11   | 12   |      |      |      |      |      |      |      |      |      |      |      |      |      |      |      |      |      |      |      |      |      |    |    |    |    |    |    |    |  |    |    |    |  |  |  |  |  |  |  |  |  |  |  |  |  |  |  |  |  |  |  |  |  |  |  |  |  |  |  |  |  |
| 6. South Africa      | 0.68              | 0.71 | 0.58 | 0.75 | 0.71 |      |      |      |      |      |      |      |      |      |      | IO   |      |      |      |      |      |      |      |      |      |      |      |      |      |      |      |      |      |    |    |    |    |    |    |    |  |    |    |    |  |  |  |  |  |  |  |  |  |  |  |  |  |  |  |  |  |  |  |  |  |  |  |  |  |  |  |  |  |
| 7. Tanzania          | 0.60              | 0.63 | 0.52 | 0.69 | 0.62 | 0.48 |      |      |      |      |      |      |      |      |      |      |      |      |      |      |      |      |      |      |      |      |      |      |      |      |      |      |      |    |    |    |    |    |    |    |  |    |    |    |  |  |  |  |  |  |  |  |  |  |  |  |  |  |  |  |  |  |  |  |  |  |  |  |  |  |  |  |  |
| 8. Madagascar        | 0.87              | 0.90 | 0.81 | 0.95 | 0.89 | 0.73 | 0.72 |      |      |      |      |      |      |      |      |      |      |      |      |      |      |      |      |      |      |      |      |      |      |      |      |      |      |    |    |    |    |    |    |    |  |    |    |    |  |  |  |  |  |  |  |  |  |  |  |  |  |  |  |  |  |  |  |  |  |  |  |  |  |  |  |  |  |
| 9. Seychelles        | 0.73              | 0.77 | 0.62 | 0.80 | 0.77 | 0.68 | 0.58 | 0.54 |      |      |      |      |      |      |      |      |      |      |      |      |      |      |      |      |      |      |      |      |      |      |      |      |      |    |    |    |    |    |    |    |  |    |    |    |  |  |  |  |  |  |  |  |  |  |  |  |  |  |  |  |  |  |  |  |  |  |  |  |  |  |  |  |  |
| 10. Singapore        | 0.85              | 0.88 | 0.75 | 0.91 | 0.87 | 0.59 | 0.65 | 0.26 | 0.36 |      |      |      |      |      |      |      |      |      |      |      |      |      |      |      |      |      |      |      |      |      |      |      |      |    |    |    |    |    |    |    |  |    |    |    |  |  |  |  |  |  |  |  |  |  |  |  |  |  |  |  |  |  |  |  |  |  |  |  |  |  |  |  |  |
| 11. Indonesia, Java  | 0.72              | 0.76 | 0.62 | 0.82 | 0.75 | 0.55 | 0.55 | 0.50 | 0.42 | 0.34 |      |      |      |      |      |      |      |      |      |      |      |      |      |      |      |      |      |      |      |      |      |      |      |    |    |    |    |    |    |    |  |    |    |    |  |  |  |  |  |  |  |  |  |  |  |  |  |  |  |  |  |  |  |  |  |  |  |  |  |  |  |  |  |
| 12 Australia, W.     | 0.88              | 0.90 | 0.79 | 0.97 | 0.90 | 0.48 | 0.69 | 0.73 | 0.53 | 0.50 | 0.58 |      |      |      |      |      |      |      |      |      |      | 13   | 14   | 15   | 16   | 17   | 18   | 19   | 20   | 21   | 22   |      |      |    |    |    |    |    |    |    |  |    |    |    |  |  |  |  |  |  |  |  |  |  |  |  |  |  |  |  |  |  |  |  |  |  |  |  |  |  |  |  |  |
| 13. Philippines      | 0.75              | 0.78 | 0.67 | 0.83 | 0.77 | 0.51 | 0.50 | 0.51 | 0.36 | 0.44 | 0.42 | 0.55 |      |      |      |      |      |      |      |      |      |      | WP   |      |      |      |      |      |      |      |      |      |      |    |    |    |    |    |    |    |  |    |    |    |  |  |  |  |  |  |  |  |  |  |  |  |  |  |  |  |  |  |  |  |  |  |  |  |  |  |  |  |  |
| 14. Japan, Miyazaki  | 0.83              | 0.87 | 0.73 | 0.92 | 0.87 | 0.58 | 0.68 | 0.47 | 0.21 | 0.29 | 0.39 | 0.47 | 0.32 |      |      |      |      |      |      |      |      |      |      |      |      |      |      |      |      |      |      |      |      |    |    |    |    |    |    |    |  |    |    |    |  |  |  |  |  |  |  |  |  |  |  |  |  |  |  |  |  |  |  |  |  |  |  |  |  |  |  |  |  |
| 15. Japan, Ogasawara | 0.74              | 0.78 | 0.64 | 0.81 | 0.77 | 0.56 | 0.54 | 0.51 | 0.23 | 0.50 | 0.50 | 0.60 | 0.20 | 0.31 |      |      |      |      |      |      |      |      |      |      |      |      |      |      |      |      |      |      |      |    |    |    |    |    |    |    |  |    |    |    |  |  |  |  |  |  |  |  |  |  |  |  |  |  |  |  |  |  |  |  |  |  |  |  |  |  |  |  |  |
| 16. Australia, QL    | 0.86              | 0.89 | 0.78 | 0.94 | 0.88 | 0.46 | 0.60 | 0.41 | 0.70 | 0.46 | 0.55 | 0.70 | 0.44 | 0.62 | 0.43 |      |      |      |      |      |      |      |      |      |      |      |      |      |      |      |      |      |      |    |    |    |    |    |    |    |  |    |    |    |  |  |  |  |  |  |  |  |  |  |  |  |  |  |  |  |  |  |  |  |  |  |  |  |  |  |  |  |  |
| 17. Australia, NSW   | 0.84              | 0.88 | 0.75 | 0.93 | 0.87 | 0.72 | 0.71 | 0.56 | 0.19 | 0.38 | 0.46 | 0.53 | 0.46 | 0.27 | 0.38 | 0.74 |      |      |      |      |      |      |      |      |      |      |      |      |      |      |      |      |      |    |    |    |    |    |    |    |  |    |    |    |  |  |  |  |  |  |  |  |  |  |  |  |  |  |  |  |  |  |  |  |  |  |  |  |  |  |  |  |  |
| 18. Tonga            | 0.77              | 0.81 | 0.68 | 0.85 | 0.81 | 0.56 | 0.52 | 0.54 | 0.31 | 0.47 | 0.49 | 0.57 | 0.19 | 0.33 | 0.12 | 0.47 | 0.39 |      |      |      |      |      |      |      |      |      |      |      |      |      |      |      |      |    |    |    |    |    |    |    |  |    |    |    |  |  |  |  |  |  |  |  |  |  |  |  |  |  |  |  |  |  |  |  |  |  |  |  |  |  |  |  |  |
| 19. Samoa            | 0.85              | 0.88 | 0.76 | 0.91 | 0.87 | 0.51 | 0.62 | 0.40 | 0.52 | 0.24 | 0.44 | 0.56 | 0.52 | 0.37 | 0.58 | 0.23 | 0.50 | 0.55 |      |      |      |      |      |      |      |      |      |      |      |      |      |      |      |    |    |    |    |    |    |    |  |    |    |    |  |  |  |  |  |  |  |  |  |  |  |  |  |  |  |  |  |  |  |  |  |  |  |  |  |  |  |  |  |
| 20. USA, Hawaii      | 0.79              | 0.80 | 0.67 | 0.84 | 0.81 | 0.65 | 0.72 | 0.79 | 0.28 | 0.57 | 0.61 | 0.55 | 0.51 | 0.37 | 0.38 | 0.82 | 0.47 | 0.44 | 0.64 |      |      |      |      |      |      |      |      |      |      |      |      |      |      |    |    |    |    |    |    |    |  |    |    |    |  |  |  |  |  |  |  |  |  |  |  |  |  |  |  |  |  |  |  |  |  |  |  |  |  |  |  |  |  |
| 21. FP, Marquesus    | 0.88              | 0.89 | 0.77 | 0.94 | 0.90 | 0.52 | 0.76 | 0.46 | 0.70 | 0.47 | 0.59 | 0.73 | 0.53 | 0.63 | 0.59 | 0.43 | 0.73 | 0.58 | 0.49 | 0.78 |      |      |      |      |      |      |      |      |      |      |      |      |      |    |    |    |    |    |    |    |  |    |    |    |  |  |  |  |  |  |  |  |  |  |  |  |  |  |  |  |  |  |  |  |  |  |  |  |  |  |  |  |  |
| 22. Chile, Easter    | 0.87              | 0.90 | 0.77 | 0.94 | 0.89 | 0.56 | 0.55 | 0.58 | 0.53 | 0.49 | 0.53 | 0.62 | 0.30 | 0.49 | 0.35 | 0.50 | 0.58 | 0.34 | 0.60 | 0.66 | 0.60 |      |      |      |      |      |      |      |      |      |      | 23   | 24   | 25 | 26 |    |    |    |    |    |  |    |    |    |  |  |  |  |  |  |  |  |  |  |  |  |  |  |  |  |  |  |  |  |  |  |  |  |  |  |  |  |  |
| 23. Mexico, SIN      | 0.80              | 0.79 | 0.67 | 0.83 | 0.80 | 0.58 | 0.63 | 0.89 | 0.68 | 0.81 | 0.68 | 0.86 | 0.55 | 0.80 | 0.53 | 0.69 | 0.87 | 0.59 | 0.79 | 0.57 | 0.53 | 0.49 |      |      |      |      |      |      |      |      |      |      | EP   |    |    |    |    |    |    |    |  |    |    |    |  |  |  |  |  |  |  |  |  |  |  |  |  |  |  |  |  |  |  |  |  |  |  |  |  |  |  |  |  |
| 24. Mexico, OAX      | 0.80              | 0.80 | 0.67 | 0.83 | 0.80 | 0.57 | 0.62 | 0.91 | 0.69 | 0.83 | 0.69 | 0.84 | 0.54 | 0.81 | 0.53 | 0.68 | 0.89 | 0.58 | 0.79 | 0.43 | 0.49 | 0.50 | 0.12 |      |      |      |      |      |      |      |      |      |      |    |    |    |    |    |    |    |  |    |    |    |  |  |  |  |  |  |  |  |  |  |  |  |  |  |  |  |  |  |  |  |  |  |  |  |  |  |  |  |  |
| 25 Ecuador           | 0.79              | 0.79 | 0.67 | 0.82 | 0.79 | 0.64 | 0.70 | 0.91 | 0.71 | 0.83 | 0.71 | 0.91 | 0.61 | 0.85 | 0.58 | 0.75 | 0.89 | 0.65 | 0.85 | 0.53 | 0.51 | 0.51 | 0.16 | 0.07 |      |      |      |      |      |      |      |      |      |    |    |    |    |    |    |    |  |    |    |    |  |  |  |  |  |  |  |  |  |  |  |  |  |  |  |  |  |  |  |  |  |  |  |  |  |  |  |  |  |
| 26 Panama, VER       | 0.76              | 0.77 | 0.66 | 0.81 | 0.78 | 0.58 | 0.60 | 0.86 | 0.65 | 0.79 | 0.65 | 0.83 | 0.52 | 0.78 | 0.49 | 0.65 | 0.83 | 0.55 | 0.77 | 0.60 | 0.49 | 0.44 | 0.17 | 0.14 | 0.17 |      |      |      |      |      |      |      |      |    |    | 27 | 28 | 29 | 30 | 31 |  |    |    |    |  |  |  |  |  |  |  |  |  |  |  |  |  |  |  |  |  |  |  |  |  |  |  |  |  |  |  |  |  |
| 27. Panama, COL      | 0.82              | 0.84 | 0.72 | 0.88 | 0.84 | 0.48 | 0.60 | 0.80 | 0.72 | 0.72 | 0.61 | 0.74 | 0.50 | 0.72 | 0.55 | 0.58 | 0.81 | 0.55 | 0.70 | 0.65 | 0.46 | 0.38 | 0.21 | 0.19 | 0.28 | 0.13 |      |      |      |      |      |      |      |    |    |    | WA |    |    |    |  |    |    |    |  |  |  |  |  |  |  |  |  |  |  |  |  |  |  |  |  |  |  |  |  |  |  |  |  |  |  |  |  |
| 28. USA, Florida     | 0.76              | 0.78 | 0.65 | 0.83 | 0.78 | 0.54 | 0.47 | 0.77 | 0.56 | 0.70 | 0.56 | 0.78 | 0.41 | 0.68 | 0.38 | 0.53 | 0.75 | 0.44 | 0.65 | 0.58 | 0.50 | 0.35 | 0.13 | 0.14 | 0.22 | 0.12 | 0.14 |      |      |      |      |      |      |    |    |    |    |    |    |    |  |    |    |    |  |  |  |  |  |  |  |  |  |  |  |  |  |  |  |  |  |  |  |  |  |  |  |  |  |  |  |  |  |
| 29. Brazil, PA       | 0.62              | 0.65 | 0.53 | 0.69 | 0.65 | 0.40 | 0.32 | 0.81 | 0.59 | 0.74 | 0.58 | 0.78 | 0.45 | 0.74 | 0.40 | 0.53 | 0.78 | 0.47 | 0.70 | 0.61 | 0.68 | 0.39 | 0.31 | 0.30 | 0.40 | 0.33 | 0.33 | 0.15 |      |      |      |      |      |    |    |    |    |    |    |    |  |    |    |    |  |  |  |  |  |  |  |  |  |  |  |  |  |  |  |  |  |  |  |  |  |  |  |  |  |  |  |  |  |
| 30. Brazil, PE       | 0.76              | 0.78 | 0.64 | 0.82 | 0.78 | 0.63 | 0.51 | 0.76 | 0.41 | 0.54 | 0.47 | 0.66 | 0.55 | 0.53 | 0.53 | 0.70 | 0.60 | 0.60 | 0.51 | 0.45 | 0.64 | 0.50 | 0.28 | 0.29 | 0.35 | 0.31 | 0.33 | 0.15 | 0.33 |      |      |      |      |    |    |    |    |    |    |    |  |    |    |    |  |  |  |  |  |  |  |  |  |  |  |  |  |  |  |  |  |  |  |  |  |  |  |  |  |  |  |  |  |
| 31. Brazil, RJ       | 0.76              | 0.78 | 0.64 | 0.82 | 0.78 | 0.65 | 0.53 | 0.77 | 0.41 | 0.53 | 0.48 | 0.68 | 0.58 | 0.57 | 0.53 | 0.55 | 0.73 | 0.60 | 0.61 | 0.53 | 0.46 | 0.64 | 0.50 | 0.28 | 0.29 | 0.35 | 0.32 | 0.34 | 0.17 | 0.35 | 0.00 |      |      |    |    |    |    |    |    |    |  | 32 | 33 | 34 |  |  |  |  |  |  |  |  |  |  |  |  |  |  |  |  |  |  |  |  |  |  |  |  |  |  |  |  |  |
| 32. Senegal          | 0.81              | 0.81 | 0.70 | 0.84 | 0.81 | 0.55 | 0.62 | 0.96 | 0.75 | 0.89 | 0.74 | 0.83 | 0.60 | 0.87 | 0.55 | 0.68 | 0.93 | 0.62 | 0.85 | 0.61 | 0.55 | 0.56 | 0.30 | 0.16 | 0.20 | 0.26 | 0.36 | 0.29 | 0.43 | 0.47 | 0.49 |      |      |    |    |    |    |    |    |    |  | EA |    |    |  |  |  |  |  |  |  |  |  |  |  |  |  |  |  |  |  |  |  |  |  |  |  |  |  |  |  |  |  |
| 33. Ghana            | 0.80              | 0.80 | 0.72 | 0.84 | 0.80 | 0.59 | 0.62 | 0.72 | 0.79 | 0.76 | 0.71 | 0.72 | 0.72 | 0.76 | 0.73 | 0.70 | 0.84 | 0.73 | 0.73 | 0.64 | 0.61 | 0.72 | 0.65 | 0.50 | 0.55 | 0.58 | 0.60 | 0.64 | 0.67 | 0.67 | 0.69 | 0.49 |      |    |    |    |    |    |    |    |  |    |    |    |  |  |  |  |  |  |  |  |  |  |  |  |  |  |  |  |  |  |  |  |  |  |  |  |  |  |  |  |  |
| 34. Angola           | 0.72              | 0.74 | 0.64 | 0.79 | 0.73 | 0.59 | 0.58 | 0.54 | 0.67 | 0.60 | 0.61 | 0.82 | 0.66 | 0.62 | 0.67 | 0.72 | 0.73 | 0.67 | 0.63 | 0.75 | 0.71 | 0.63 | 0.70 | 0.72 | 0.76 | 0.75 | 0.66 | 0.60 | 0.50 | 0.57 | 0.57 | 0.93 | 0.57 |    |    |    |    |    |    |    |  |    |    |    |  |  |  |  |  |  |  |  |  |  |  |  |  |  |  |  |  |  |  |  |  |  |  |  |  |  |  |  |  |
